# Supplementary material
Source: Springer Nature journal article supplement (https://www.springermedizin.de/resource/supplementary/13012_2011_393_MOESM3_ESM.pdf/9629954)
Supplement: MOESM3 [file 9629954]

## LEVEL 4

## Impaired Physical Ability

### Criteria for inclusion

In the context of this project, impaired physical ability is defined as:  
- an inability to perform physical activities or tasks necessary for self-care.  
This may include permanent or temporary disability due to amputation, arthritis, severe pain, spinal injury, acquired brain injury, neurological disorder (e.g., cerebral palsy, muscular dystrophy) or other comorbidity, or hearing impairment.

Stroke, peripheral neuropathy and diabetic eye disease are covered elsewhere.

### Objectives of care / components of care

1. Identify co-morbidities or factors likely to affect the functional capacity of a person with diabetes.
2. Recognize how functional capacity may impact on lifestyle, diabetes self-management and glycemic control.
3. Review / revise education for a person with diabetes and impaired functional capacity (as well as significant others), including information on diabetes management and pertinent self-care practices.
4. Review / revise dietary management for a person with diabetes and impaired functional capacity (as well as significant others).
5. Review / revise exercise program for a person with diabetes and impaired functional capacity.
6. Implement measures to assist a person with impaired functional capacity (including significant others) to better manage their diabetes.
7. Refer patient to appropriate services or providers.

### Service requirements (over a 12 month period)

| Clinical role          | Competency          | Occupation             | Number & duration of consults |
|------------------------|---------------------|------------------------|-------------------------------|
| Assessment & education | Lower limb care     | Podiatrist             | 1 x 60 mins                   |
|                        | Occup. engagement   | Occupational therapist | 1 x 60 mins                   |
|                        | Orthotic support    | Orthotist              | 1 x 60 mins, 1 x 30 mins      |
|                        | Diabetes education  | Diabetes educator      | 1 x 30 mins                   |
|                        | Exerc. prescription | Exercise physiologist  | 5 x 40 mins                   |
| Treatment & review     | Lower limb care     | Podiatrist             | 2 x 20 mins                   |
|                        | Medical care        | General practitioner   | 1 x 10 mins                   |
|                        | Preventative care   | Practice nurse         | 1 x 10 mins                   |
